# Supplementary material for: Macrophage migration inhibitory factor of Syrian golden hamster shares structural and functional similarity with human counterpart and promotes pancreatic cancer
Source: PubMed Central journal article supplement (PMC6820718; doi:10.1038/s41598-019-51947-7), 2019-10-29
Supplement: 41598_2019_51947_MOESM1_ESM.pdf [file 41598_2019_51947_MOESM1_ESM.pdf]

Macrophage migration inhibitory factor of Syrian golden hamster shares structural and functional similarity with human counterpart and promotes pancreatic cancer

Voddu Suresh<sup>1,3\*</sup>, Rajivgandhi Sundaram<sup>2,4\*</sup>, Pujarini Dash<sup>1\*</sup>, Surendra Chandra Sabat<sup>5</sup>, Debasish Mohapatra<sup>1</sup>, Sneha Mohanty<sup>6</sup>, Dileep Vasudevan<sup>2#</sup>, Shantibhusan Senapati<sup>1#</sup>

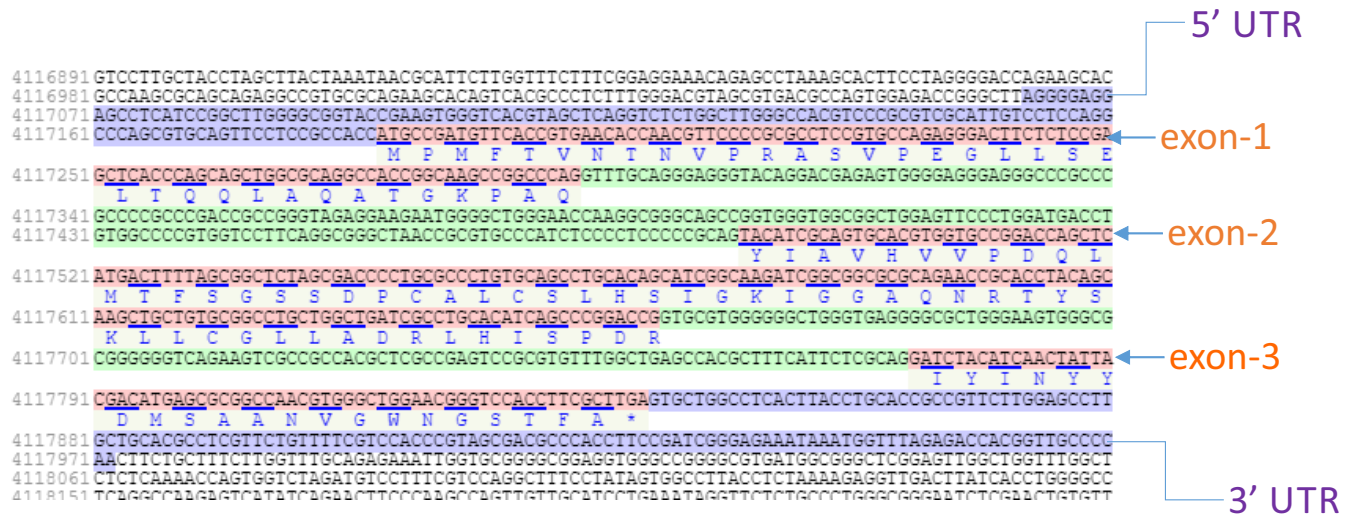

**Supplementary Figure 1:** Genomic organization of *Mesocricetus auratus* Mif gene shown in NCBI Reference Sequence NW\_004801628.1

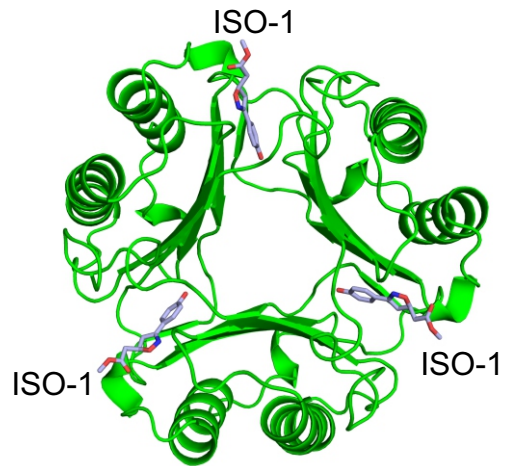

**Supplementary Figure 2:** Crystal structure of homo-trimeric human MIF (green) in complex with ISO-1 (blue) [PDB id: 1ljt]. The MIF trimer is shown in cartoon representation and the three ISO-1 molecules in stick model.

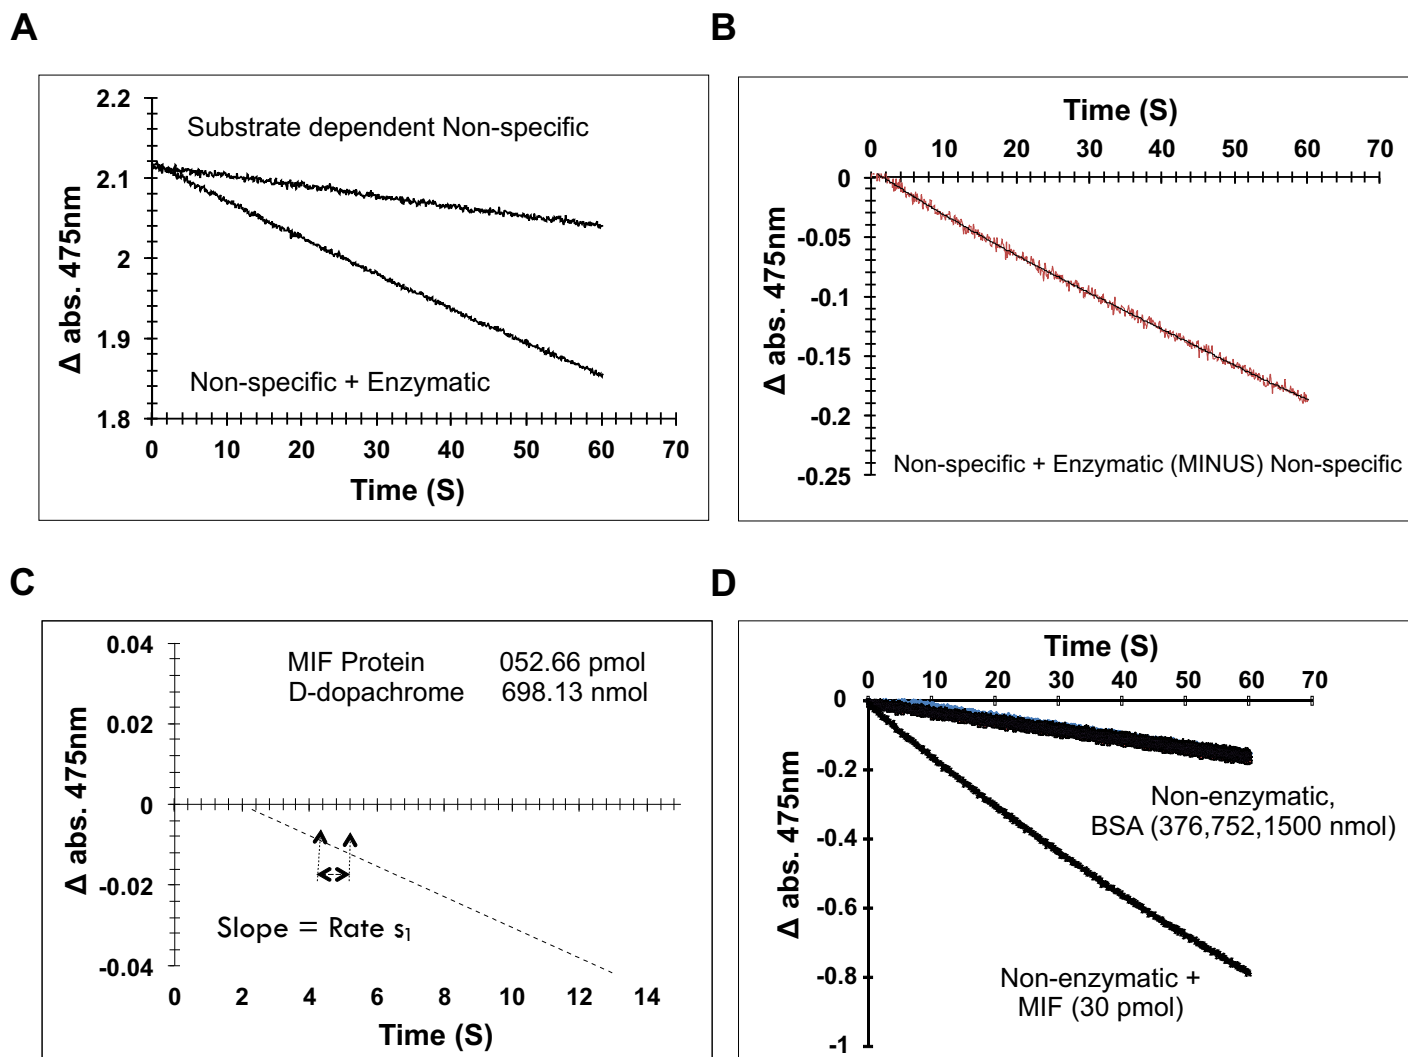

**Supplementary Figure 3:** Background correction for the non-enzymatic activity of L-dopachrome methyl ester.

**Figure 1D & 1E**

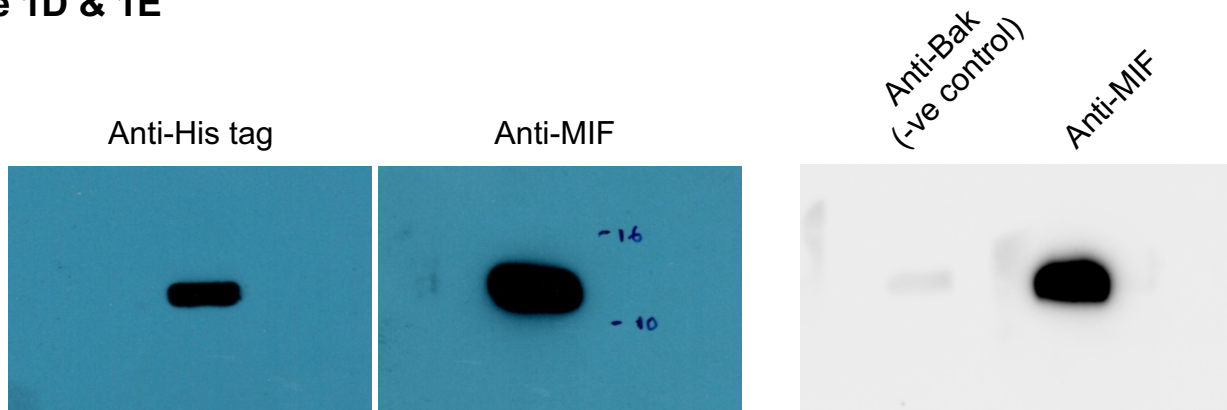

**Figure 6 A**

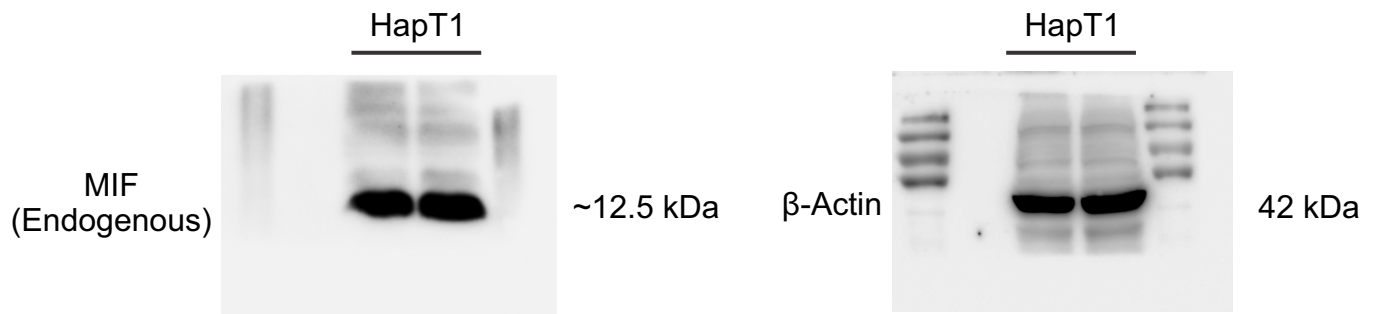

**Supplementary Figure 4:** Uncropped blots for corresponding figures.
